# Supplementary material for: What is Quality End‐of‐Life Care for Patients With Heart Failure? A Qualitative Study With Physicians
Source: PubMed Central journal article supplement — J Am Heart Assoc. 2020 Aug 31;9(18):e016505. doi: 10.1161/JAHA.120.016505 (PMC7727006; doi:10.1161/jaha.120.016505), 2020-08-31
Supplement: JAH3-9-e016505-s001.pdf [file JAH3-9-e016505-s001.pdf]

# **SUPPLEMENTAL MATERIAL**

### Table S1. Final Interview Guide.

1. First, I'd like to hear what time period you would consider to be "end-of-life" for heart failure patients?
  - How often are you able to identify that the patient is entering into their last *TIME PERIOD MENTIONED ABOVE*?
2. Next, I'd like to hear how you define "high quality" end-of-life care for patients with advanced heart failure?
  - What differences, if any, have you noticed between your definition of "high-quality" and what the patients and their families feel is an ideal end-of-life experience?
  - *Possible prompts, if applicable:*
    - *Health care utilization – including procedures*
    - *Location of death*
3. Now, I'd like to hear your perspectives on prognostication for patients with advanced heart failure patients.
  - How comfortable are you in your ability to prognosticate for advanced heart failure patients?
  - What are the challenges that you encounter with respect to prognostication for advanced heart failure patients?
  - How much uncertainty do you feel around your prognostic estimates?
4. Next, I'd like to hear about your experiences communicating prognosis with your advanced heart failure patients.
  - How comfortable do you feel discussing prognosis?
  - When do you feel, if at all, providers should communicate prognostic information with advanced heart failure patients?
  - How do you communicate prognosis?
    - Do you use words or numbers?
    - Do you convey uncertainty around the patient's prognosis?
  - How do patients in your experience react to prognostic information?
  - How often do you encounter situations where you struggle to get patient's to accept a limited prognosis?
5. Now, let's think about goals of care conversations.
  - How comfortable do you feel having goals of care conversations?
  - When in the disease course do you typically conduct these conversations?

6. Tell me about your prior experiences with palliative care specialists (if any) for AHF patients.
  - To what extent have you consulted with palliative care experts in the care of your patients?
  - To what extent have palliative care consultations been helpful?
  - What difficulties have you encountered with palliative care consultations?
    - *Possible prompts*
      - availability of palliative medicine providers
      - setting of palliative care consultation (inpatient vs outpatient)
  - When do you think that palliative care specialists should ideally become involved in the care of patients with advanced heart failure?
    - Can you tell me about any specific advantages or disadvantages to involving palliative care early in the disease process?
7. Tell me about your prior experiences with hospice care for AHF patients.
  - To what extent have you referred your AHF patients for hospice care?
  - To what extent has hospice care been helpful for your patients?
  - What difficulties have you encountered with hospice care?
8. How does rurality of patient residence and/or practice location impact the ability to achieve a quality EOL experience?
  - How might the availability of palliative care experts via telehealth be useful?
9. Which health care providers bear the greatest responsibility for ensuring that patients receive high-quality EOL care?
  - Primary care providers
  - General cardiologist
  - Advanced heart failure specialists
  - Palliative care doctors
  - EP specialists
  - CT Surgeons
10. Are there any EOL quality considerations that you think are specific to your practice specialty?
11. Are there any procedures that are appropriate and/or beneficial during the EOL period?

12. Take a moment to reflect on one advanced heart failure patient for whom you think the **end-of-life period went well and the patient received high-quality care**. Tell me what stands out about this patient's care and why you feel that the quality of care was excellent.
13. Take a moment to reflect on one advanced heart failure patient for whom you think the **end-of-life period went poorly and the patient received sub-optimal quality care**. Tell me what stands out about this patient's care and why you think things didn't go as well as you would hope.

Thanks so much for your participation in this project. We have two last questions for you. How often do you provide care in a satellite (non-Portland) location? Can you think about a few community providers at your satellite location that provide care for patients with advanced heart failure?
